# Supplementary material for: Rearrangement of 3D genome organization in breast cancer epithelial to mesenchymal transition and metastasis organotropism
Source: eLife. 2025 Nov 12;13:RP103697. doi: 10.7554/eLife.103697 (PMC12611262; doi:10.7554/eLife.103697)
Supplement: Supplementary file 1. — Information about cell lines derived from the following sources: ATCC, Engel and Young, 1978, Gazdar et al., 1998, Cellosaurus.org, Wang et al., 2021, and Stone et al., 1978. [file elife-103697-supp1.xlsx]

## Sheet: Sheet1
Cell line	Type	Tissue of origin	Race	Collection Site	Subtype​	ER​	PR​	HER2​	Hi-C Accession	Hi-C Replicates	RNA-seq Accession	RNA-seq replicates
HMEC	Human Mammary Epithelium	Breast	Unknown	Breast	Normal	+​	+​	+​	GSE167150	Replicates Combined	GSE167152	Replicates 1 and 2
MCF10A	Human Mammary Epithelium	Breast	Caucasian	Breast	Fibrocystic	+​	+​	+​	GSE109229	Replicates Combined	GSE96860	Replicates 1, 2, 3 and 4
BT474	Infiltrative Ductal Carcinoma	Breast	Caucasian	Solid Tumor, breast	Luminal B	+​	+​	+​	GSE109229	Replicates Combined	GSE179280	Replicates 1, 2, and 3
ZR751	Infiltrative Ductal Carcinoma	Breast	Caucasian	Ascites fluid	Luminal A	+​	P/N	-	GSE128676	Replicate 1	NA	NA
ZR7530	Infiltrative Ductal Carcinoma	Breast	African American	Ascites fluid	Luminal B	+​	-	+	GSE167150	Replicates Combined	GSE167152	Replicates 1 and 2
MCF7	Infiltrative Ductal Carcinoma	Breast	Caucasian	Pleural Effusion, Lung	Luminal A	+​	+​	-​	GSE109229	Replicates Combined	GSE96860	Replicates 1, 2, 3 and 4
T47D	Infiltrative Ductal Carcinoma	Breast	Caucasian	Pleural Effusion, Lung	Luminal A	+​	+​	-​	GSE167150	Replicates Combined	GSE167152	Replicates 1 and 2
HCC1954	Infiltrative Ductal Carcinoma	Breast	East Indian	Solid Tumor, breast	HER2	-​	-​	+​	GSE167150	Replicates Combined	GSE167152	Replicates 1 and 2
SKBR3	Adenocarcinoma	Breast	Caucasian	Pleural Effusion, Lung	HER2	-​	-​	+​	GSE109229	Replicates Combined	GSE96860	Replicates 1, 2, 3 and 4
HCC70	Infiltrative Ductal Carcinoma	Breast	African American	Solid Tumor, breast	Triple Negative A	-​	-​	-​	GSE167150	Replicates Combined	GSE167152	Replicates 1 and 2
BT549	Invasive breast carcinoma	Breast	Caucasian	Solid Tumor, breast	Triple Negative B	-​	-​	-​	GSE167150	Replicates Combined	GSE167152	Replicates 1 and 2
MDA-MB-231	Adenocarcinoma	Breast	Caucasian	Pleural Effusion, Lung	Triple Negative B	-​	-​	-​	GSE143678	Replicate 1	GSE179280	Replicates 1, 2, and 3
HTBE	Bronchial-Tracheal Epithelial cells	Lung	Unknown	Lung	Normal	NA	NA	NA	GSE113703	Replicates Combined	GSE89008	Replicates 1 and 2
A549	Adenocarcinoma	Lung	Caucasian	Solid Tumor, Lung	NSCLC​	NA	NA	NA	ENCSR444WCZ	Replicates Combined	ENCSR000CON	Replicates 1 and 2
H460	Large cell lung cancer	Lung	Unknown	Pleural Effusion, Lung	NSCLC​	NA	NA	NA	ENCSR489OCU	Replicates Combined	ENCSR164OCT	Replicates 1 and 2
NHA	Normal Astrocytes	Brain	Unknown	Cerebral cortex	Normal	NA	NA	NA	GSE162976	Replicate 1	NA	NA
SF9427	Glioblastoma	Brain	Unknown	Brain	Glioma	NA	NA	NA	GSE162976	Replicate 1	NA	NA
LNCaP	Adenocarcinoma	Prostate	Caucasian	Lymph Node, Prostate	-	NA	NA	NA	GSM5241744	Replicate 1	NA	NA
DU145	Adenocarcinoma	Prostate	Caucasian	Brain	-	NA	NA	NA	GSM5241745, GSM5241746	Replicates 1 and 2	NA	NA
