# Supplementary material for: Rearrangement of 3D genome organization in breast cancer epithelial to mesenchymal transition and metastasis organotropism
Source: eLife. 2025 Nov 12;13:RP103697. doi: 10.7554/eLife.103697 (PMC12611262; doi:10.7554/eLife.103697)
Supplement: Supplementary file 2. — Compartmental_PC1_Positive: genes found within the top 100 highly varying genomic regions in compartmental PCA analysis (positive PC1); Compartmental_PC1_Negative: genes found within the top 100 highly varying genomic regions in compartmental PCA analysis (negative PC1); RNAseq_PC1_Positive: top 100 highly varying genes in transcriptomics PCA analysis (positive PC1); RNAseq_PC1_Negative: top 100 highly varying genes in transcriptomics PCA analysis (negative PC1); Curated_Epithelial: curated epithelial genes; Curated_Mesenchymal: curated mesenchymal genes. [file elife-103697-supp2.xlsx]

## Sheet: Sheet1
Compartmental PC1_Positive	Compartmental PC1_Negative	RNAseq_PC1 Positive	RNAseq_PC1 Negative	Curated_ Epithelial	Curated_ Mesenchymal
SERPINB13	FRMD3	SCGB2A2	MT1E	ABCC3	AKAP12
SERPINB4	IDNK	TRIL	PRKCDBP	ABHD11	AKAP2
SERPINB3	NTN1	S100A14	VIM	ADAP1	AKT3
SERPINB11	LOC101928266	IGFBP5	CAV1	AGR2	ANGPTL2
SERPINB7	STX8	ALDH3B2	SNAI2	CRYBG1	ANK2
MIRLET7A2	PEPD	AZGP1	AXL	AKR1B10	AP1S2
MIR100	CHST8	C1orf64	MMP14	ALDH3B2	ASPN
MIR100HG	DNAJC1	SLC44A4	GPX1	ALOX5	AXL
PRNP	EBLN1	RAB25	SERPINE1	ANK3	BAG2
PRND	TUNAR	KRT4	PTRF	ANXA4	BGN
PRNT	LINC00551	INHBB	CXCL1	ANXA9	BICC1
ETS1	LINC00443	DSCAM-AS1	EMP3	AP1M2	BNC2
MIR6090	MYH14	LRRC26	RGS4	AQP3	C1orf54
LOC101929517	KCNC3	SPDEF	PNMAL1	ARAP2	C1R
UBASH3B	NAPSB	CEACAM6	FOSL1	AREG	C1S
CRTAM	NAPSA	C2orf54	MSN	ARHGAP32	CALD1
LOC339593	NR1H2	FXYD3	ZNF655	ARHGAP8	CAV1
MIR125B1	POLD1	HOXC10	PLAU	ARHGDIB	CCL2
BLID	SPIB	S100P	SPARC	ARHGEF5	CCL8
CYYR1	MYBPC2	C9orf152	MSLN	ATP1B1	CD163
LOC101929413	FAM71E1	PLA2G2A	LOX	ATP2C2	CDH11
SIRPD	EMC10	FOXA1	TGFB1I1	AZGP1	CDH2
SIRPB1	SH3GL3	TMEM125	FST	B3GNT3	CDK14
SIRPG	ADAMTSL3	RHOV	HTRA1	BCAS1	CEP170
SIRPG-AS1	COLEC12	BCAS1	RAB34	BIK	CHN1
PTPRM	CETN1	LAD1	GAS6	BLNK	CHRDL1
MIR5009	CLUL1	TFF3	IGFBP6	BSPRY	CLEC2B
LOC101926942	TYMSOS	ELF3	ADAMTS1	INAVA	CLIC4
KIF20B	TYMS	EFHD1	AKR1B1	C1orf116	COL14A1
LINC00865	ENOSF1	SMIM22	CXCL2	C4orf19	COL15A1
LINC01375	YES1	CLDN3	SRGN	CAMK2N1	COL5A2
CUBN	ADGRE3	PRR15L	CCDC80	CAPN1	COL6A1
TRDMT1	ZNF333	CX3CL1	UCN2	CBLC	COL6A2
C20orf196	ADGRE2	TRPV6	SERPINE2	CD2AP	COLEC12
CHGB	OR7C1	CALML5	CHST2	CD46	CRISPLD2
TRMT6	OR7A5	PRSS22	NT5E	CD9	CRYAB
MCM8	OR7A10	IVL	S100A3	CDH1	CSF2RB
MCM8-AS1	OR7A17	ST14	TGM2	CDH3	CSRP2
CRLS1	INSC	GGT6	TNFSF9	CDS1	CTSK
LINC01182	ACSM2B	TMPRSS13	NNMT	CEACAM1	CXCL12
NALCN	ACSM1	S100A9	IFI27L2	CEACAM5	CXCL13
ITGBL1	THUMPD1	SCGB1D2	LIX1L	CEACAM6	CXCR4
HTR7	LOC102724084	KCTD15	APOBEC3C	CEACAM7	CYP1B1
RPP30	DYNLRB2	TMEM30B	COL6A1	CLDN3	DCN
ANKRD1	LINC01227	CRB3	GNG11	CLDN4	DDR2
XLOC_008559	CDYL2	CLDN8	ALDH3A1	CLDN7	DENND5A
MTCL1	GPR26	ENTPD2	TNFRSF10D	CNKSR1	DPT
CCBE1	CPXM2	PNMT	ACSL4	COMT	DPYSL3
NRG1-IT3	LOC102724710	KLHDC7A	IFI16	CORO2A	DSE
NRG1	FLJ46284	KCNJ11	WBP5	CTSH	ECM2
LINC01048	ZMAT4	AGR2	S100A2	CXADR	EFEMP1
LINC00547	MSX2	HOXC13	TPM2	CYB561	EFEMP2
POSTN	MIR4634	EPHB3	FOXQ1	CYP4F3	EMP3
TRPC4	LOC102724957	HID1	COL4A1	DDR1	ENPP2
ADAMTS1	LINC00470	HOXC11	LOXL2	DENND2D	ETV1
LOC100289473	MIPOL1	ENPP5	PTX3	DHCR24	EVI2A
SIRPA	LOC101927847	ID4	FOXC1	DSC2	F13A1
PDYN	FOXA1	DEGS2	ETS1	DSG2	FAP
MIR5580	TTC6	DLX3	IGFBP7	DSP	FBLN1
BMP4	PCAT18	PRLR	KIRREL	DTX4	FBN1
LOC101929095	AQP4	CCDC64B	SH3RF3-AS1	EHF	FERMT2
C1QTNF7	AQP4-AS1	MCF2L-AS1	CA9	ELF3	FGL2
CC2D2A	CHST9	MAL2	MAP7D3	ELF5	FHL1
APP	VRK3	EPB41L4A-AS2	MRC2	ELMO3	FLI1
IL21	ZNF473	PRSS8	MYL9	EPB41L4B	FLRT2
IL21-AS1	FLJ26850	C1orf210	SDPR	EPCAM	FN1
CETN4P	SNAR-A8	PRODH	TIMP1	EPHA1	FSTL1
BBS12	SNAR-A3	TINCR	FN1	EPN3	FXYD6
FGF2	SNAR-A5	SPTSSB	NOG	EPS8L1	FYN
SORL1	SNAR-A14	AP1M2	PLAT	EPS8L2	GAS1
LINC00502	SNAR-A4	EPN3	CCDC8	ERBB2	GEM
NUDT9P1	SNAR-A6	PVRL4	PNMA2	ERBB3	GFPT2
PCGF5	SNAR-A7	KLHL9	CXCL3	ERMP1	GIMAP4
ST3GAL6	SNAR-A9	BSPRY	SH2D5	ESRP1	GIMAP6
DCBLD2	SNAR-A11	SYNE4	LSP1	ESRP2	GJA1
LINC01085	SNAR-A10	SLC40A1	COL6A2	EVPL	GLIPR1
PAPPA	SNAR-B1	MZB1	EVI2A	EXPH5	GLYR1
CAMK4	SNAR-B2	YBX2	MARVELD1	EZR	GNG11
LOC101928775	SNAR-D	TC2N	TGFB1	F11R	GPM6B
LINC00474	IZUMO2	ATP6V1B1	TGFBI	FA2H	GREM1
TNC	MIR184	GPX2	AHNAK2	FAM174B	GSC
LOC101928748	ANKRD34C	PRR15	PROCR	FBP1	GUCY1B1
2025-12-01	ANKRD34C-AS1	RBBP8NL	IRX1	FGFR3	GZMK
LINC01080	TMED3	ESRP1	CAV2	FOXA1	HEG1
MIR548G	KIAA1024	SLC52A3	B3GNT5	FOXC2	IFFO1
COL8A1	CTD-2151A2.1	HIST1H2BG	GLIPR1	FUT2	IGF1
TSLP	TCAF2P1	SLC2A10	TMEM158	FUT3	IGFBP5
WDR36	LOC154761	HIST1H2AE	ITGA5	FXYD3	IL10RA
SMOX	TCAF1	CRISP3	PTGS2	GALE	ISLR
LINC01433	OR2F2	ALDH2	KRT14	GALNT3	ITM2A
ADRA1D	OR2F1	OVOL1	C3	GALNT7	JAM2
SLX4IP	OR6B1	ATP2A3	FNDC4	GDF15	JAM3
JAG1	OR2A5	PADI2	LGALS1	GMDS	KCNJ8
MIR6870	TFF2	BPIFB1	LINC00941	ADGRG1	POGLUT2
LOC101929395	TFF1	FMOD	HLA-A	GPRC5A	JCAD
LINC00911	TMPRSS3	TACSTD2	PHLDA1	GPX2	KLF8
FLRT2	UBASH3A	INPP5J	FLRT2	GRB7	P3H1
LOC100192426	RSPH1	C8orf4	ANGPTL4	GRHL1	LGALS1
HAS2	SLC37A1	MARVELD3	MXRA7	GRHL2	LHFPL6
HAS2-AS1	SEMA4D	NCCRP1	GAS6-AS2	GRHL3	LOX
TMEM230	GADD45G			HDHD3	LOXL2
PCNA	PRCAT47			HES1	LY96
PCNA-AS1	C8orf4			HNMT	MAF
CDS2	OLIG2			HPGD	MAFB
PAK3	LINC00945			ICA1	MAP1B
CAPN6	OLIG1			IL1RN	MEOX2
SPDL1	LOC101928107			IL20RA	MFAP4
DOCK2	TOX3			IRF6	MMP2
LOC101929217	CASC16			ITGB4	MOXD1
LOC101929268	SEC23B			ITGB6	MPDZ
EFCAB1	LINC00493			JUP	MS4A4A
LOC100507534	DTD1			KCNK1	MS4A6A
LOC101927132	LOC101929526			KLF5	MSN
ADAMTS5	LSM14A			KLK6	MXRA7
MIR4759	KIAA0355			KRT15	MYH10
STARD4	GGT1			KRT18	MYL9
STARD4-AS1	BCRP3			KRT19	MYLK
FAS	POM121L10P			KRT7	NAP1L3
FAS-AS1	PIWIL3			KRT8	NR3C1
MIR4679-2	TOP1P2			LAD1	NUAK1
MIR4679-1	SGSM1			LCN2	OLFML2B
CH25H	LOC101927843			LLGL2	OLFML3
LIPA	LINC00308			LRRC1	PCOLCE
ACTA2	SYK			LSR	PDGFC
MIR4666B	NUDT7			LY75	PDZRN3
IL1RAPL1	VAT1L			MALL	PLEKHO1
ANXA5	RGS6			MANSC1	PLN
TMEM155	MIR7843			MAP7	PLXNC1
PP12613	RORA			MAPK13	PMP22
EXOSC9	PCAT19			MGST2	POPDC3
CCNA2	LINC01480			MLPH	PTGDS
BBS7	CEACAM21			MPZL2	PTGIS
ATG3	CEACAM4			MST1R	PTPRC
SLC35A5	CEACAM7			MTUS1	CAVIN1
LINC01279	CEACAM5			MUC1	PTX3
CCDC80	VPS13C			MYH14	QKI
LOC101929694	GAREM			MYO1D	RARRES2
LOC101928437	WBP11P1			MYO5C	RECK
LINC01023	PGR			MYO6	RGS2
FER	LOC101054525			NQO1	RUNX1T1
CASC17	LINC00652			OAS1	SACS
LAMA2	C20orf78			OCLN	SAMSN1
ARHGAP18	SCP2D1			OR7E14P	SDC2
LINC00504	LOC100270804			OVOL1	SERPINE1
LINC01038	LOC400655			OVOL2	SERPINF1
LINC00382	LOC100505817			PERP	SERPING1
ZC3H12C	FBXO15			PHLDA2	SFRP1
CYSLTR2	LDLRAD4			PKP3	SFRP4
LOC102723505	LDLRAD4-AS1			PLLP	SH2B3
LINC01152	MIR5190			PLS1	SLC2A3
LOC102723517	OR7C2			PLXNB2	SLIT2
SOX9-AS1	SLC1A6			POF1B	SNAI1
LOC101928205	CCDC105			PLPP2	SNAI2
SOX9	CASP14			PPFIBP2	SOAT1
ANK2	OR1I1			PPL	SOBP
CAMK2D	SYDE1			PRR15L	SPARC
ALG13	ILVBL			PRSS8	SPARCL1
TRPC5	UNQ6494			PSCA	SPOCK1
TRPC5OS	SNHG10			PTK6	SRGN
	GLRX5			PTPRF	SRPX
	TCL6			PYCARD	STON1
	TCL1B			RAB11FIP1	SYNE1
	TCL1A			RAB20	SYNM
	DSCAM-IT1			RAB25	SYT11
	DSCAM			RABGAP1L	TAGLN
	NAA20			RAPGEFL1	TCF4
	CRNKL1			RBM47	TGFB1I1
	CFAP61			RHOD	TMEFF1
	MIR8084			RNF128	TMEM158
	C8orf87			S100A14	TNC
	MX2			S100P	TNS1
	MX1			SCEL	TPM2
	TMPRSS2			SCNN1A	TRPC1
	SLC24A3			SDC1	TUBA1A
	NETO1			SDC4	TUBB6
	KCTD15			SERINC5	TWIST1
	LOC286370			SFN	TWIST2
	MIR4290			SH2D3A	UCHL1
	LOC101929374			SH3YL1	VCAM1
	LOC388882			SHANK2	VCAN
	IGLL1			SLC16A5	VIM
	DRICH1			SLC22A18	VSIG4
	GUSBP11			SLC35A3	WIPF1
	LOC100130264			SLC37A1	WWTR1
	LINC00323			SLC44A4	ZCCHC24
	MIR3197			SLC9A3R1	ZEB1
	BACE2			SLPI	ZEB2
	PLAC4			SORD	ZFPM2
	FAM3B			SORL1	FAM216A
	SOD1			SPAG1	SYNE3
	SCAF4			SPDEF	MRC1
	HUNK			SPINT1	TCF3
	THOC1			SPINT2
	DSCAM-AS1			SSH3
	LINC01501			ST14
	DIRAS2			STAP2
	LINC01508			STYK1
	MIR4760			SYNGR2
	MIS18A			TACSTD2
	MRAP			TFF1
	URB1			TFF3
	SNORA80A			TGFA
	WRB			TJP2
	LCA5L			TJP3
	SH3BGR			TMC5
	MIR6508			TMC6
	B3GALT5-AS1			TMEM30B
	B3GALT5			TMPRSS2
	PCP4			TMPRSS4
	LINC00159			TNFSF13
	IGSF5			TOB1
				TOM1L1
				TOX3
				TPD52
				TRIM31
				TRPM4
				TSPAN1
				TSPAN13
				TSPAN15
				TSPAN8
				TTC39A
				TUFT1
				UGT1A1
				VAMP8
				VAV3
				VGLL1
				XBP1
				ZNF165
				ADIRF
				MISP
				CD24
				CKMT1A
